# Supplementary material for: LC-HRMS Profiling of Paralytic Shellfish Toxins in Mytilus galloprovincialis after a Gymnodinium catenatum Bloom
Source: MDPI journal article supplement (doi:10.3390/md20110680), 2022-10-28
Supplement: s1 [file s1]

## Supplementary Material

### **LC-HRMS profiling of paralytic shellfish toxins in *Mytilus galloprovincialis* after a *Gymnodinium catenatum* bloom**

Sandra Lage <sup>1,\*</sup>, Pedro Reis Costa <sup>1,2</sup>, Adelino V. M. Canário <sup>1</sup>, José P. Da Silva <sup>1</sup>

<sup>1</sup> Centre of Marine Sciences (CCMAR/CIMAR LA), University of Algarve, Campus de Gambelas, 8005-139, Faro, Portugal;

<sup>2</sup> Portuguese Institute for the Sea and Atmosphere (IPMA), Av. Brasília, 1449-006 Lisbon, Portugal

\* Correspondence: smlage@ualg.pt (S.L.)

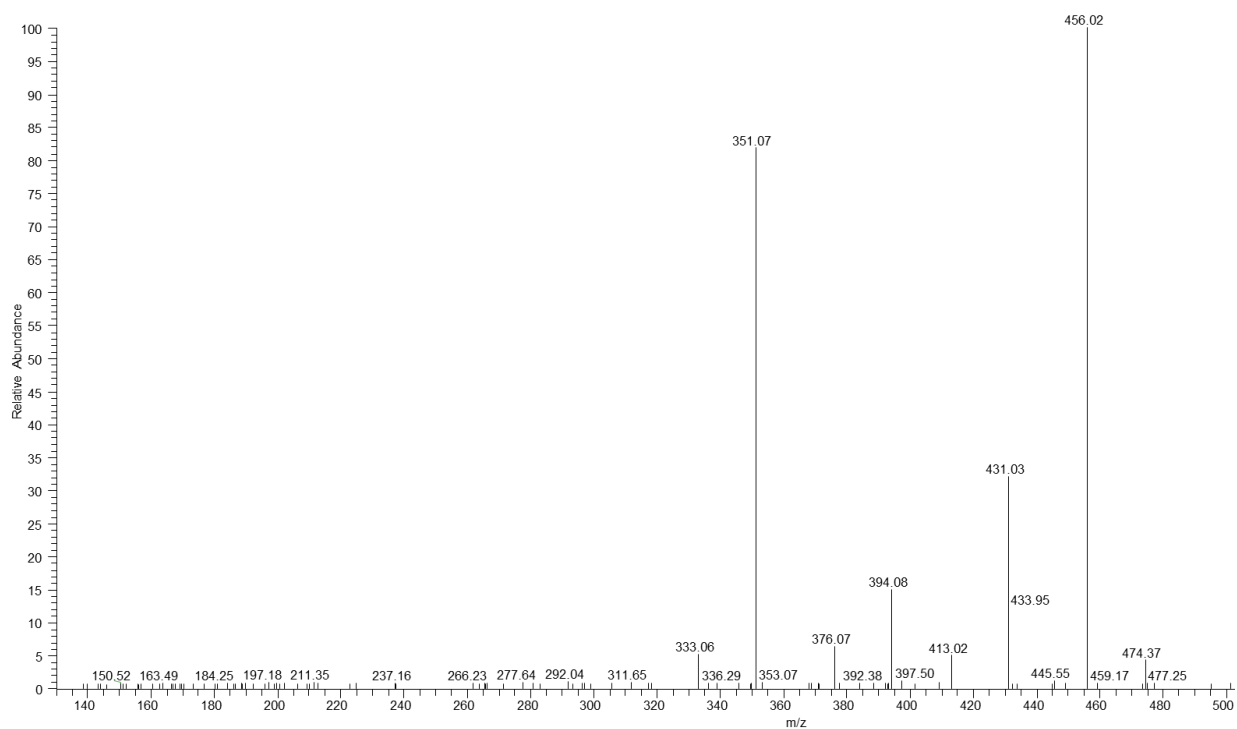

**Figure S1.** CID MS<sup>2</sup> spectrum of  $m/z$  474 (C1/2) in *M. galloprovincialis* at ESI<sup>-</sup>. Energy: 25 arbitrary units.

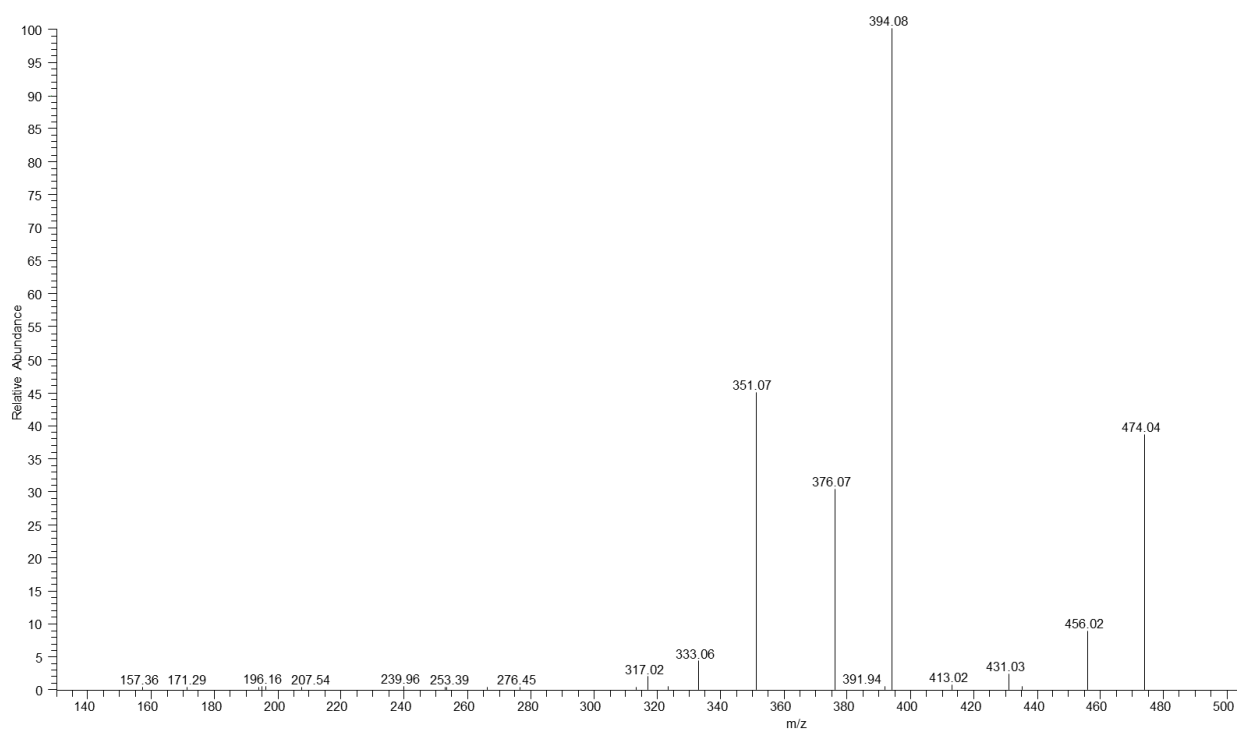

**Figure S2.** HCD MS<sup>2</sup> spectrum of  $m/z$  474 (C1/2) in *M. galloprovincialis* at ESI<sup>-</sup>. Energy: 55 arbitrary units.

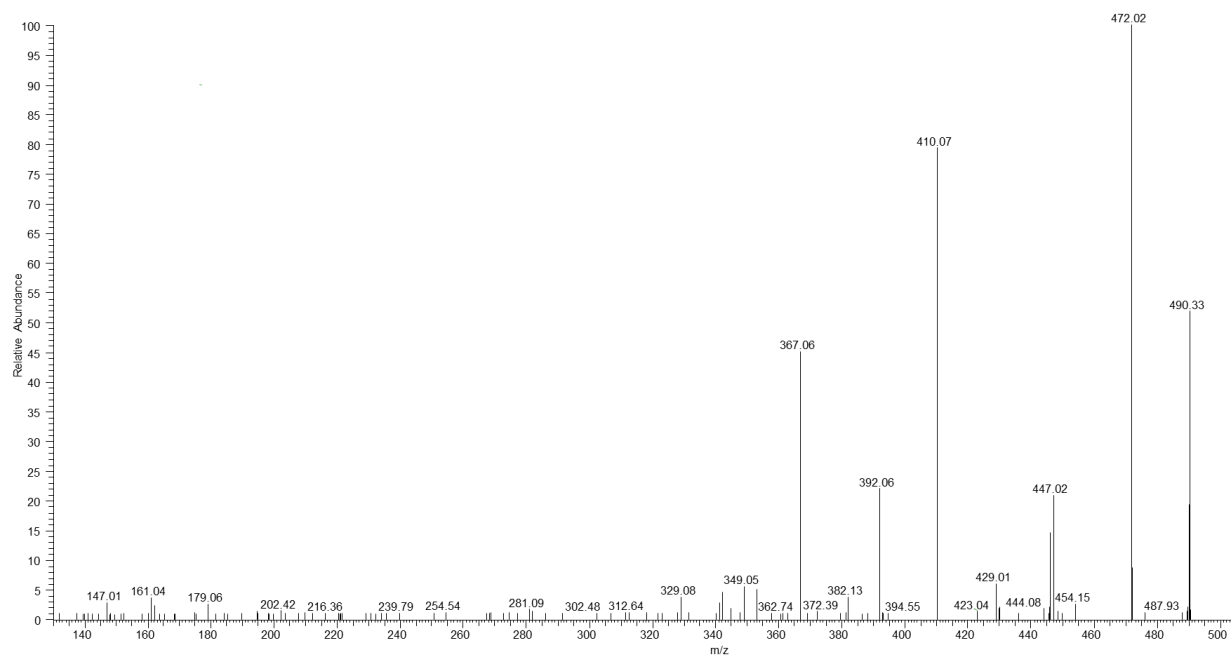

**Figure S3.** CID MS<sup>2</sup> spectrum of  $m/z$  490 (C3/4) in *M. galloprovincialis* at ESI<sup>-</sup>. Energy: 18 arbitrary units.

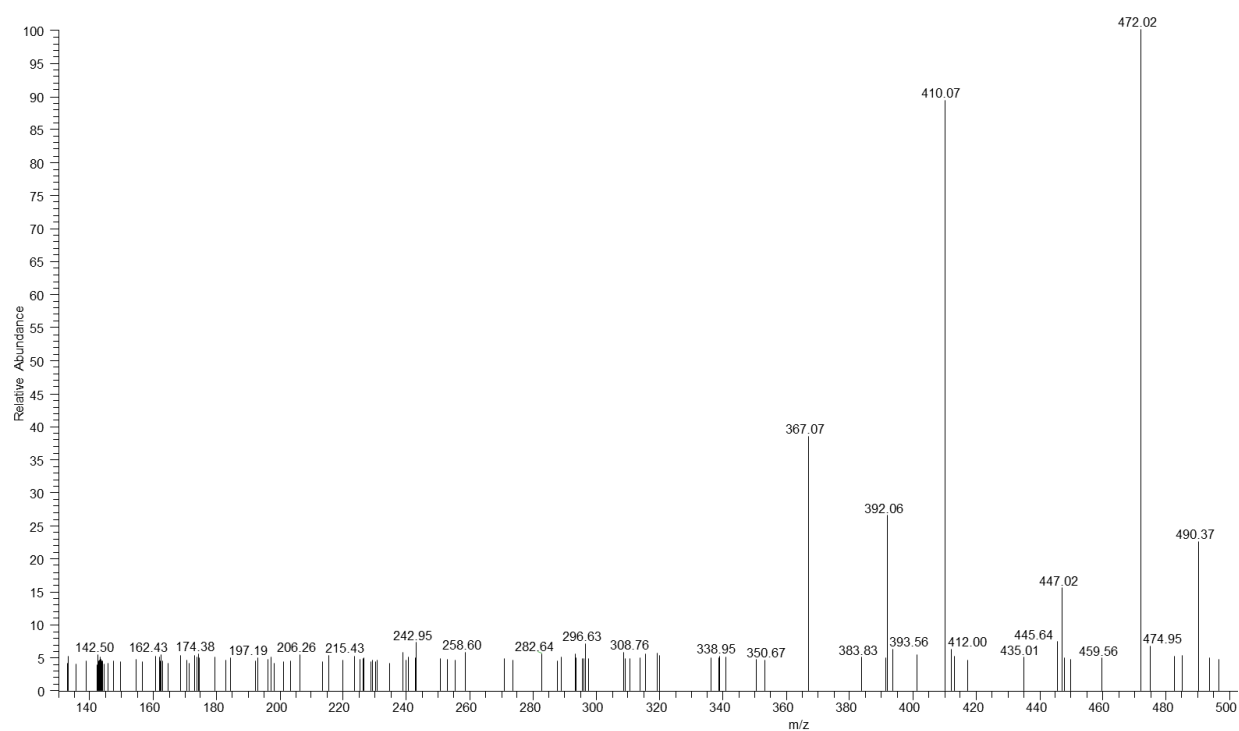

**Figure S4.** HCD MS<sup>2</sup> spectrum of  $m/z$  490 (C3/4) in *M. galloprovincialis* at ESI<sup>-</sup>. Energy: 55 arbitrary units.

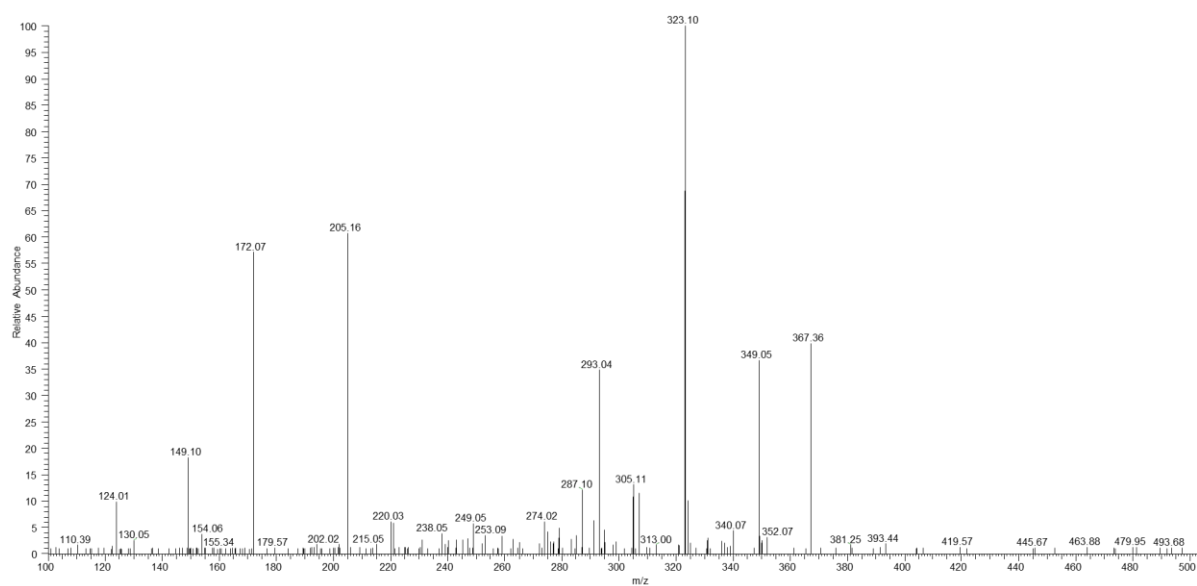

**Figure S5.** CID MS<sup>2</sup> spectrum of  $m/z$  367 (dcGTX1/4) in *M. galloprovincialis* at ESI<sup>-</sup>. Energy: 35 arbitrary units.

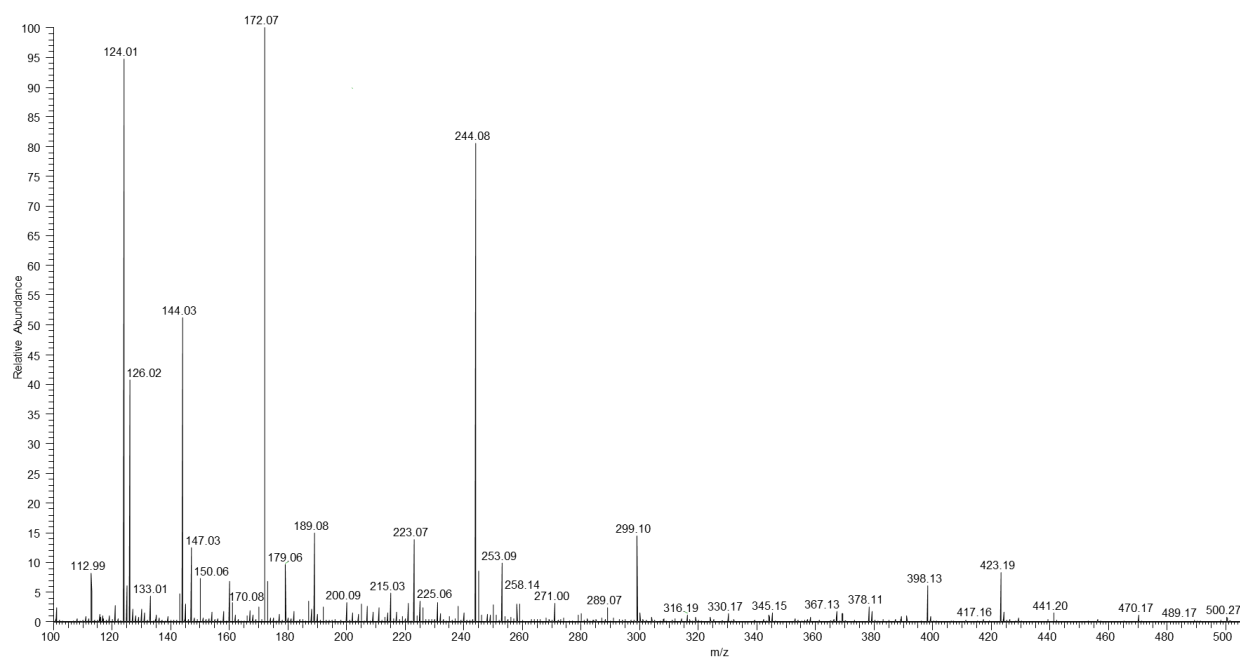

**Figure S6.** HCD MS<sup>2</sup> spectrum of  $m/z$  367 (dcGTX1/4) in *M. galloprovincialis* at ESI<sup>-</sup>. Energy: 55 arbitrary units.

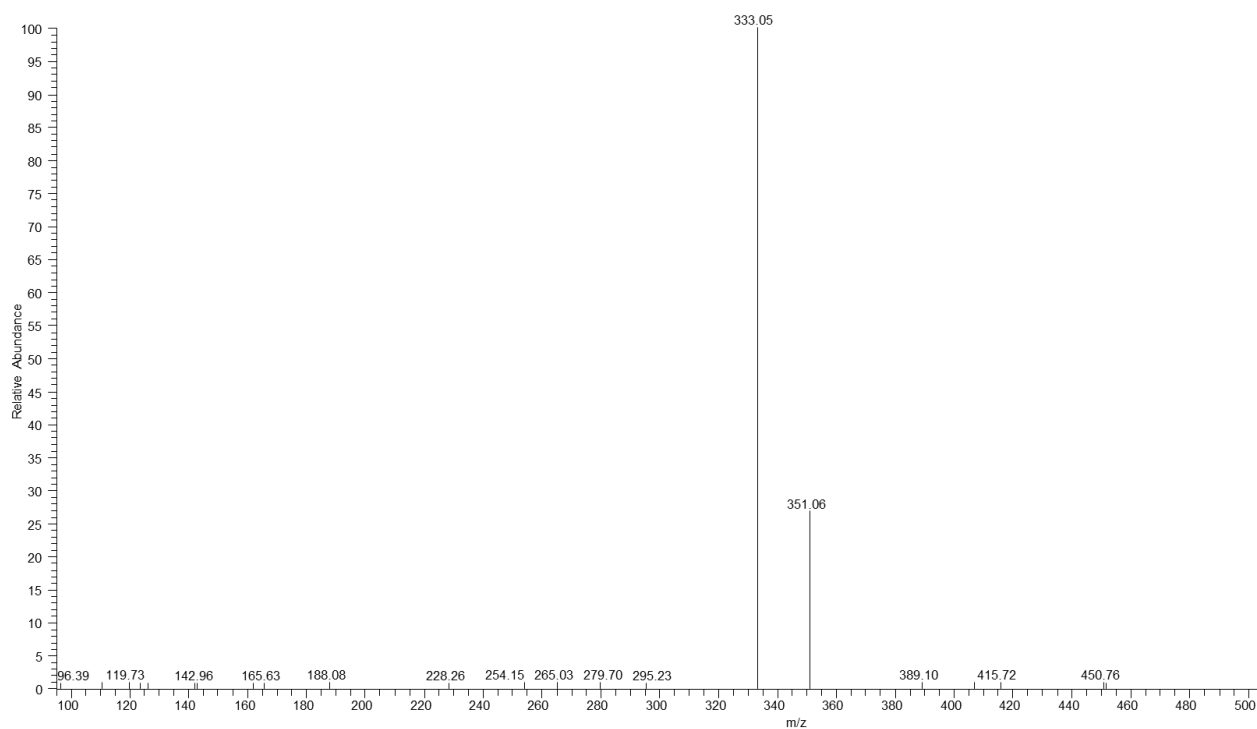

**Figure S7.** CID MS<sup>2</sup> spectrum of  $m/z$  351 (dcGTx2/3) in *M. galloprovincialis* at ESI-. Energy: 18 arbitrary units.

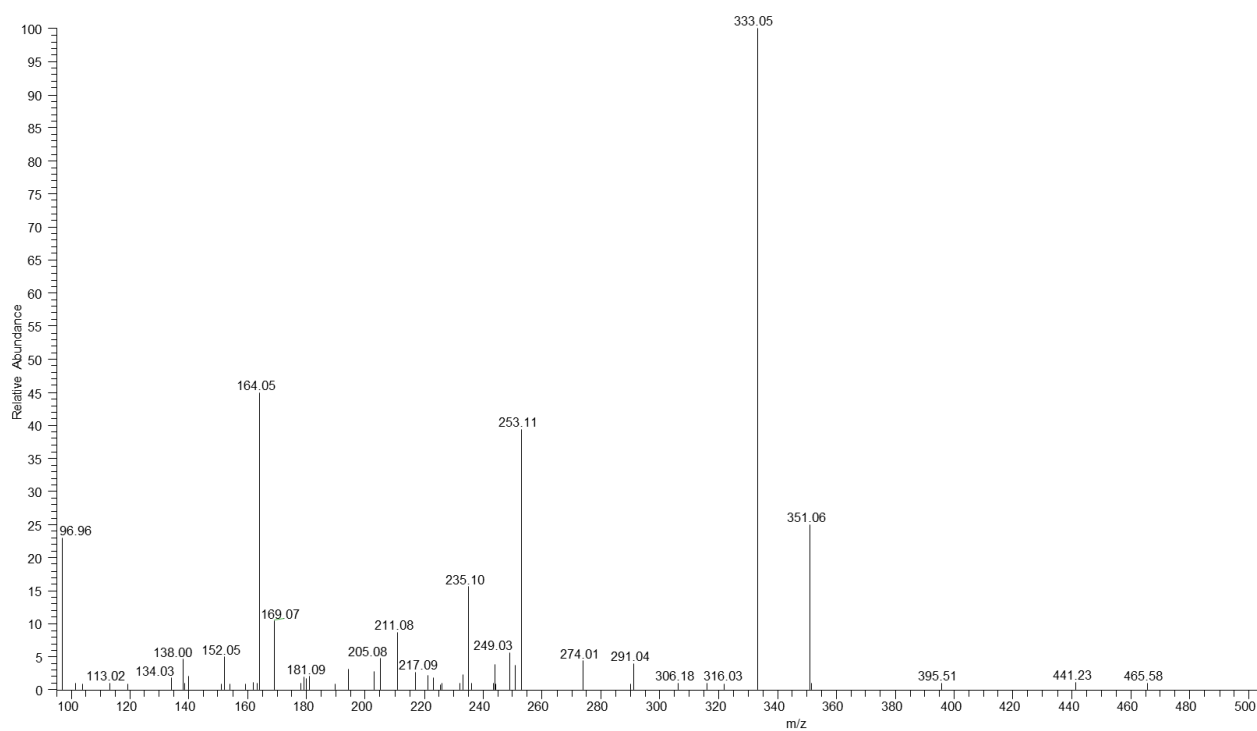

**Figure S8.** HCD MS<sup>2</sup> spectrum of  $m/z$  351 (dcGTx2/3) in *M. galloprovincialis* at ESI-. Energy: 85 arbitrary units.

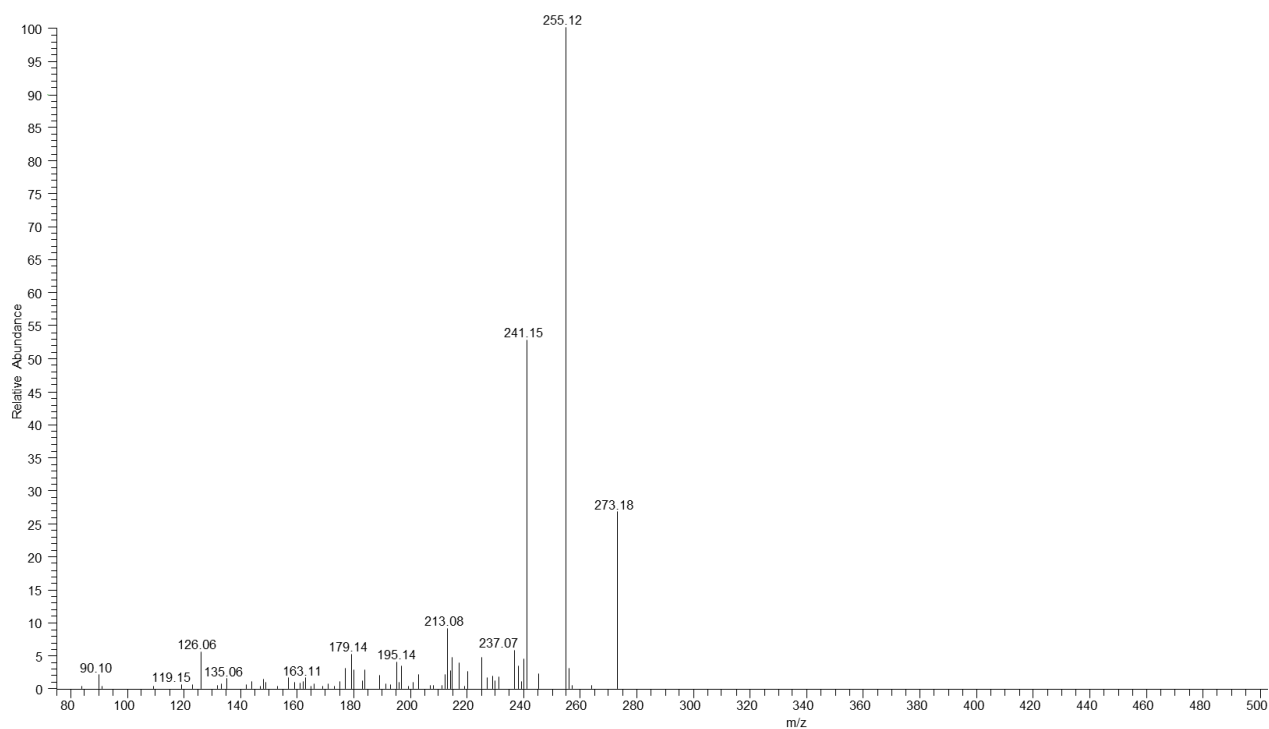

**Figure S9.** CID MS<sup>2</sup> spectrum of  $m/z$  273 (dcNeo) in *M. galloprovincialis* at ESI<sup>+</sup>. Energy: 25 arbitrary units.

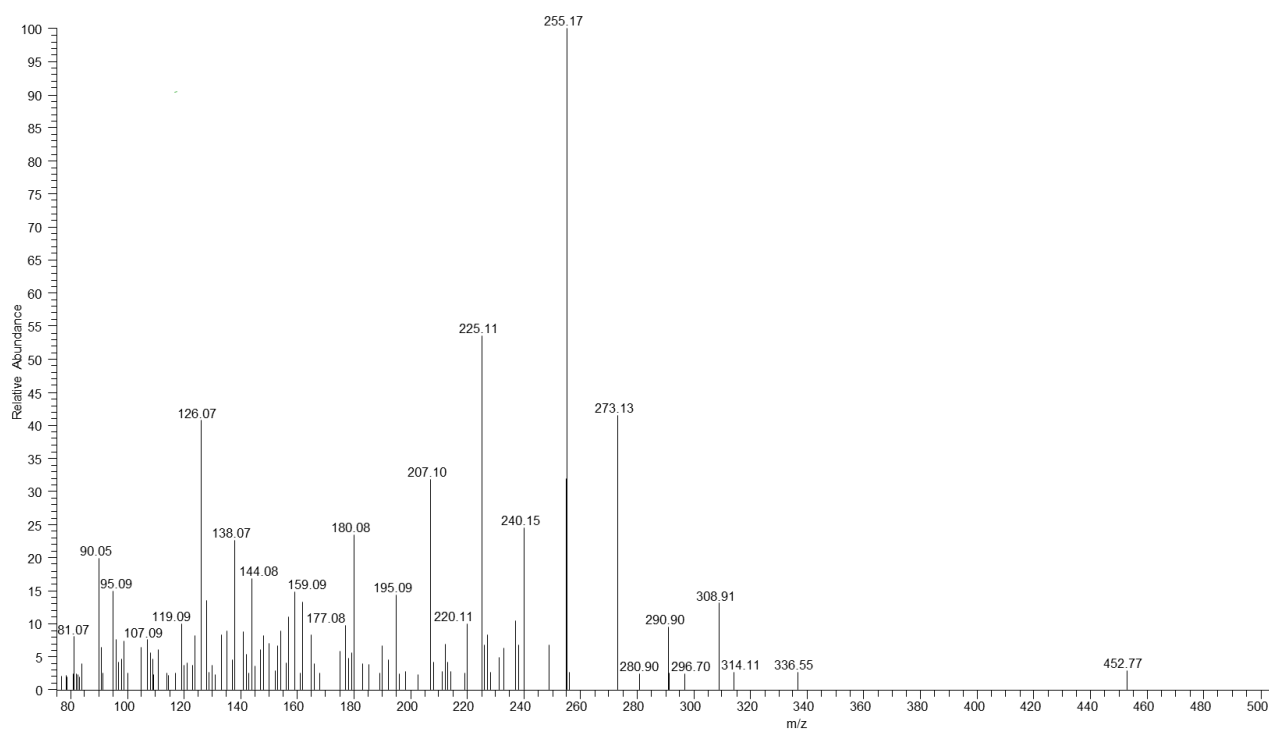

**Figure S10.** HCD MS<sup>2</sup> spectrum of  $m/z$  273 (dcNeo) in *M. galloprovincialis* at ESI<sup>+</sup>. Energy: 55 arbitrary units.

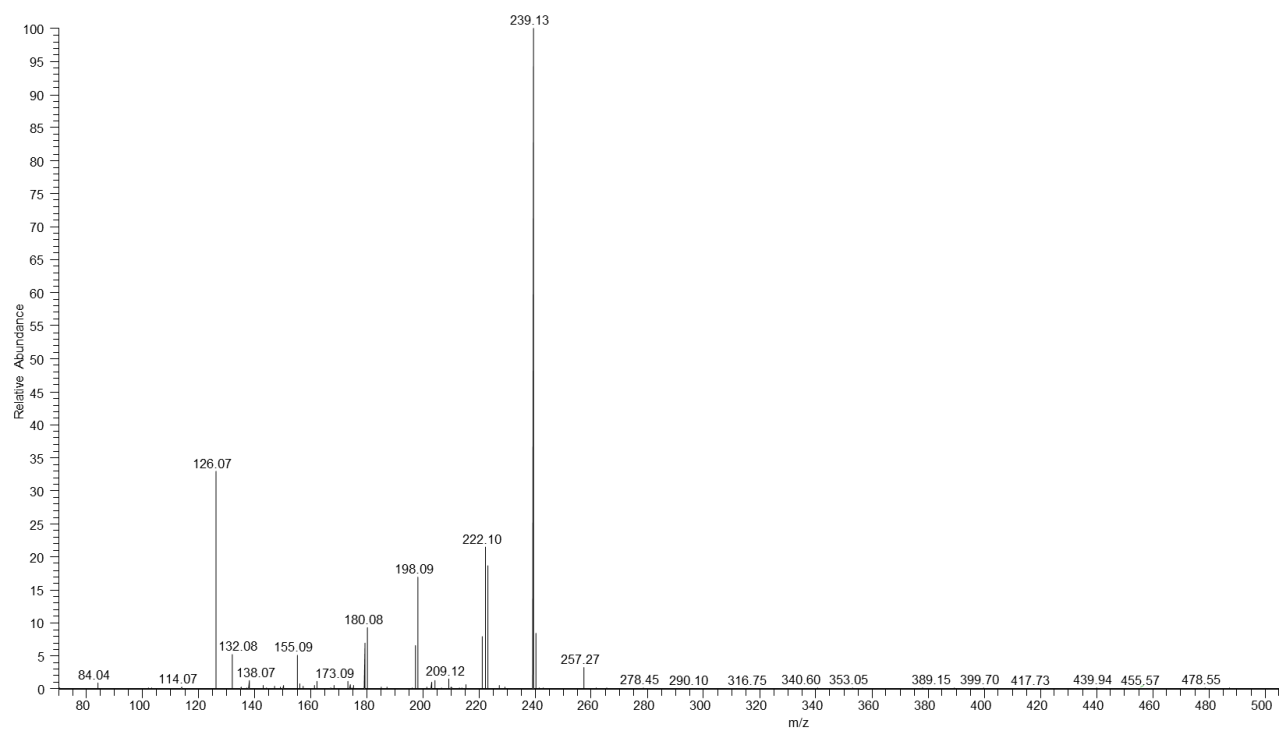

**Figure S11.** CID MS<sup>2</sup> spectrum of  $m/z$  257 (dcSTX) in *M. galloprovincialis* at ESI<sup>+</sup>. Energy: 30 arbitrary units.

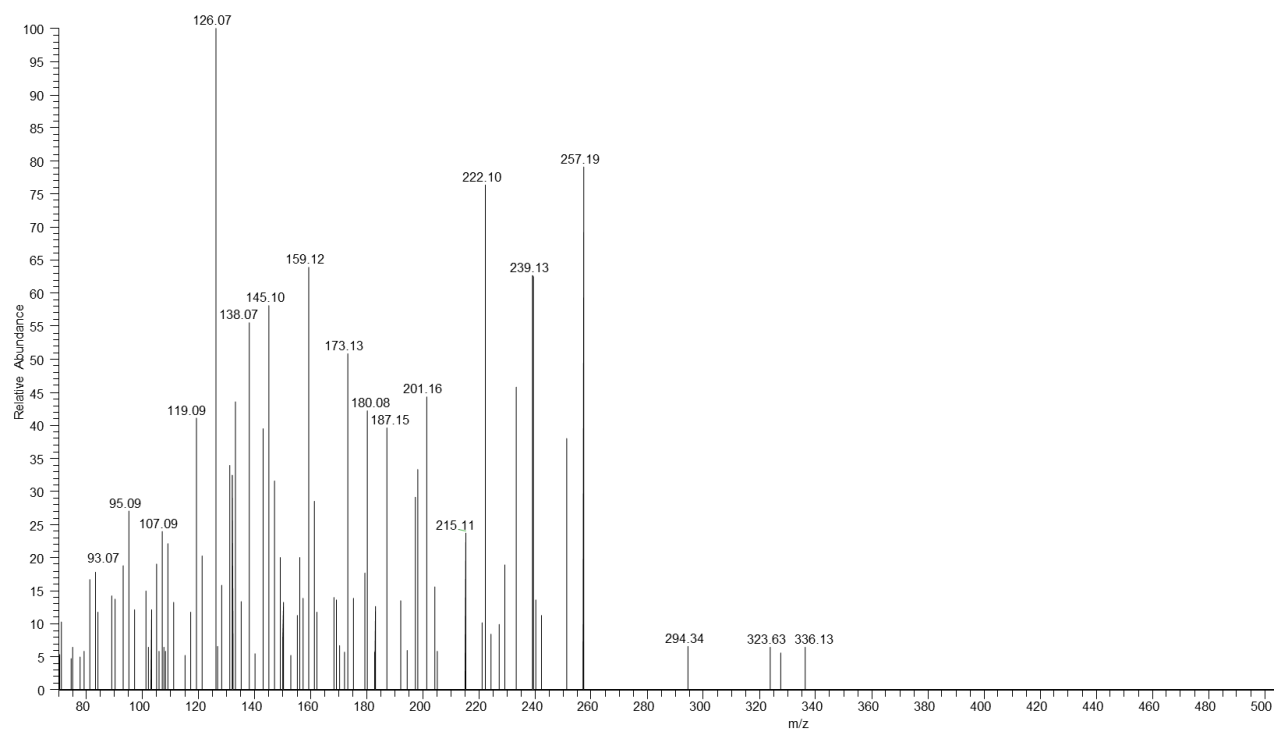

**Figure S12.** HCD MS<sup>2</sup> spectrum of  $m/z$  257 (dcSTX) in *M. galloprovincialis* at ESI<sup>+</sup>. Energy: 55 arbitrary units.

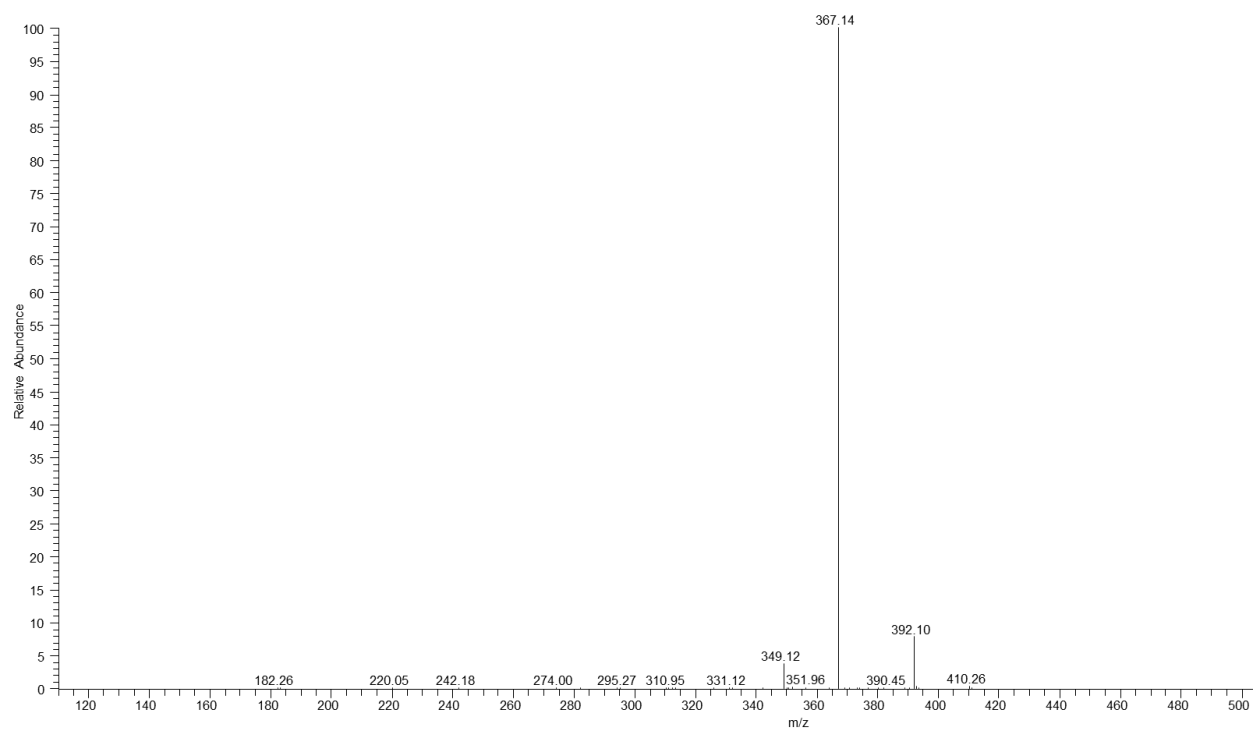

**Figure S13.** CID MS<sup>2</sup> spectrum of  $m/z$  410 (GTX4) in *M. galloprovincialis* at ESI<sup>-</sup>. Energy: 25 arbitrary units.

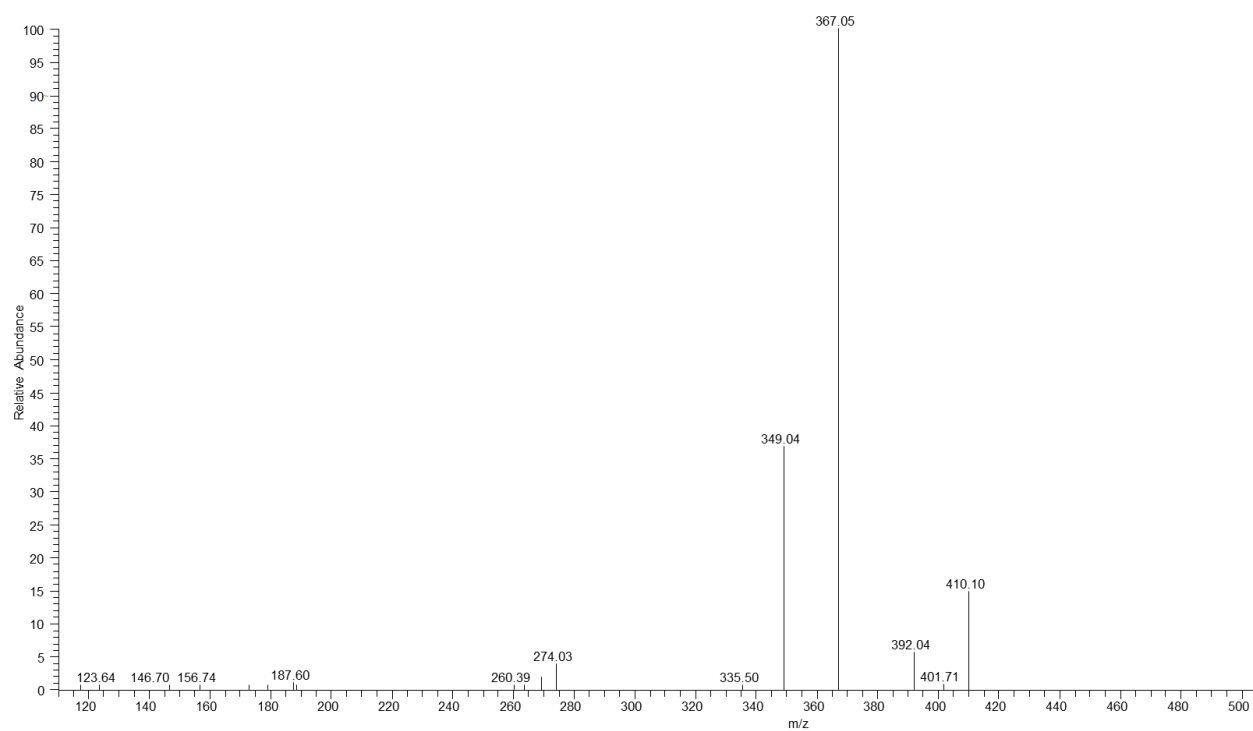

**Figure S14.** HCD MS<sup>2</sup> spectrum of  $m/z$  410 (GTX4) in *M. galloprovincialis* at ESI<sup>-</sup>. Energy: 55 arbitrary units.



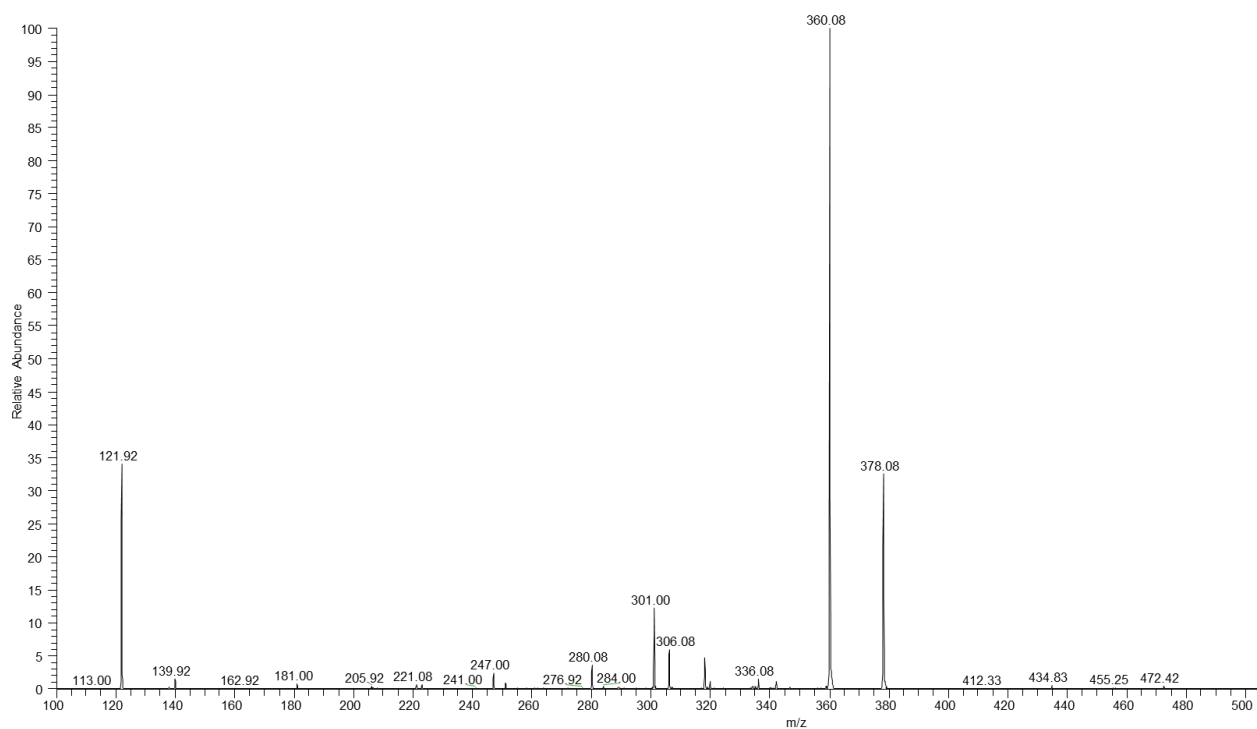

**Figure S15.** CID MS<sup>2</sup> spectrum of  $m/z$  378 (GTX5) in *M. galloprovincialis* at ESI<sup>-</sup>. Energy: 19 arbitrary units.

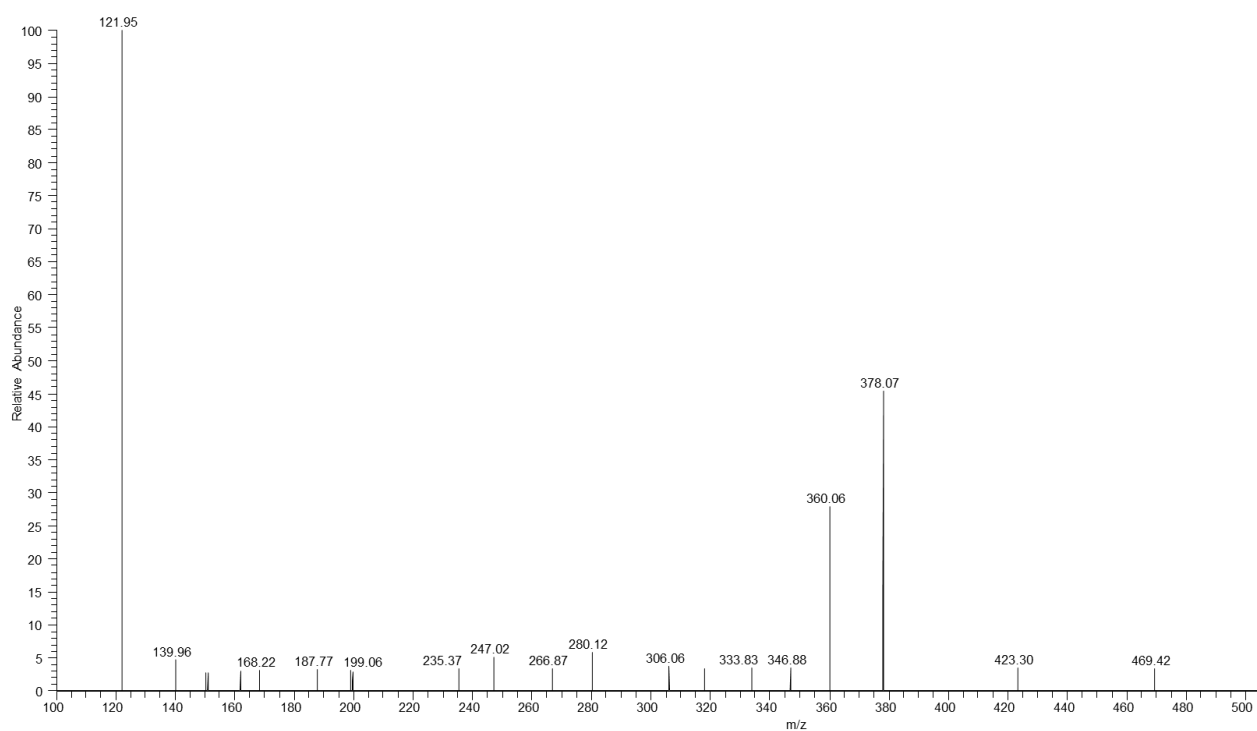

**Figure S16.** HCD MS<sup>2</sup> spectrum of  $m/z$  378 (GTX5) in *M. galloprovincialis* at ESI<sup>-</sup>. Energy: 65 arbitrary units.

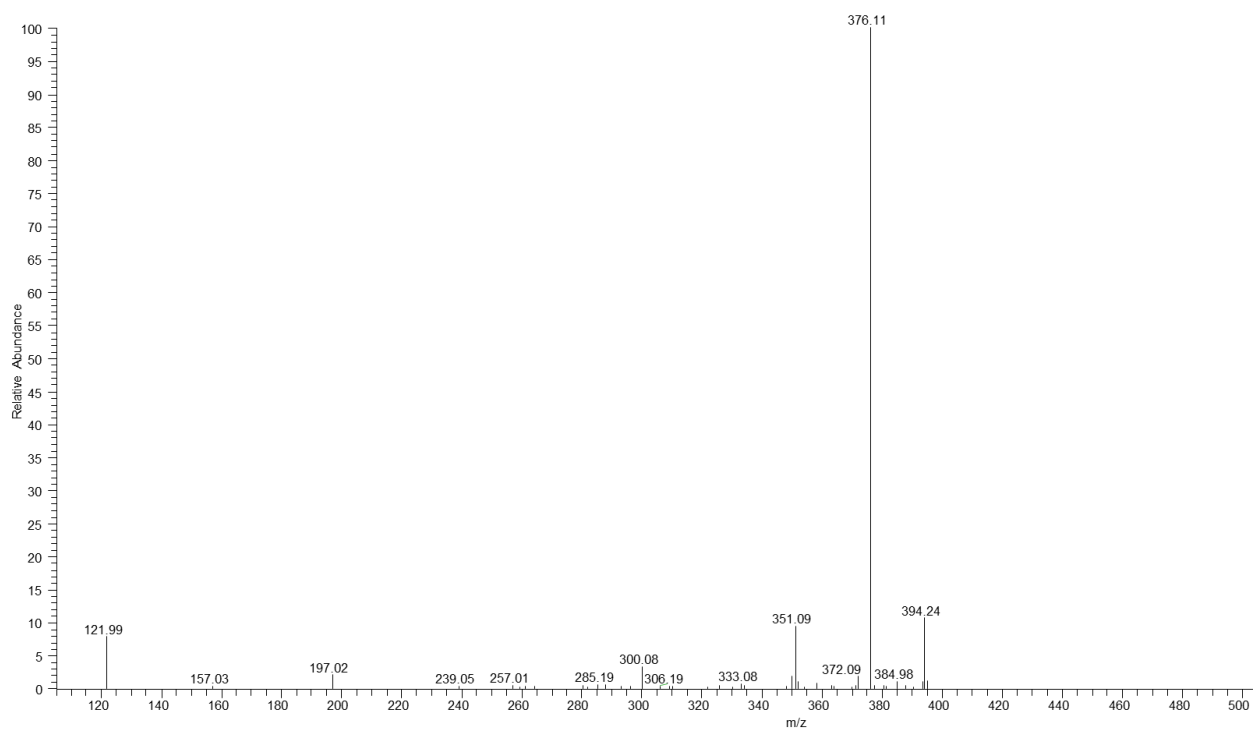

**Figure S17.** CID MS<sup>2</sup> spectrum of  $m/z$  394 (GTX6) in *M. galloprovincialis* at ESI<sup>-</sup>. Energy: 20 arbitrary units.

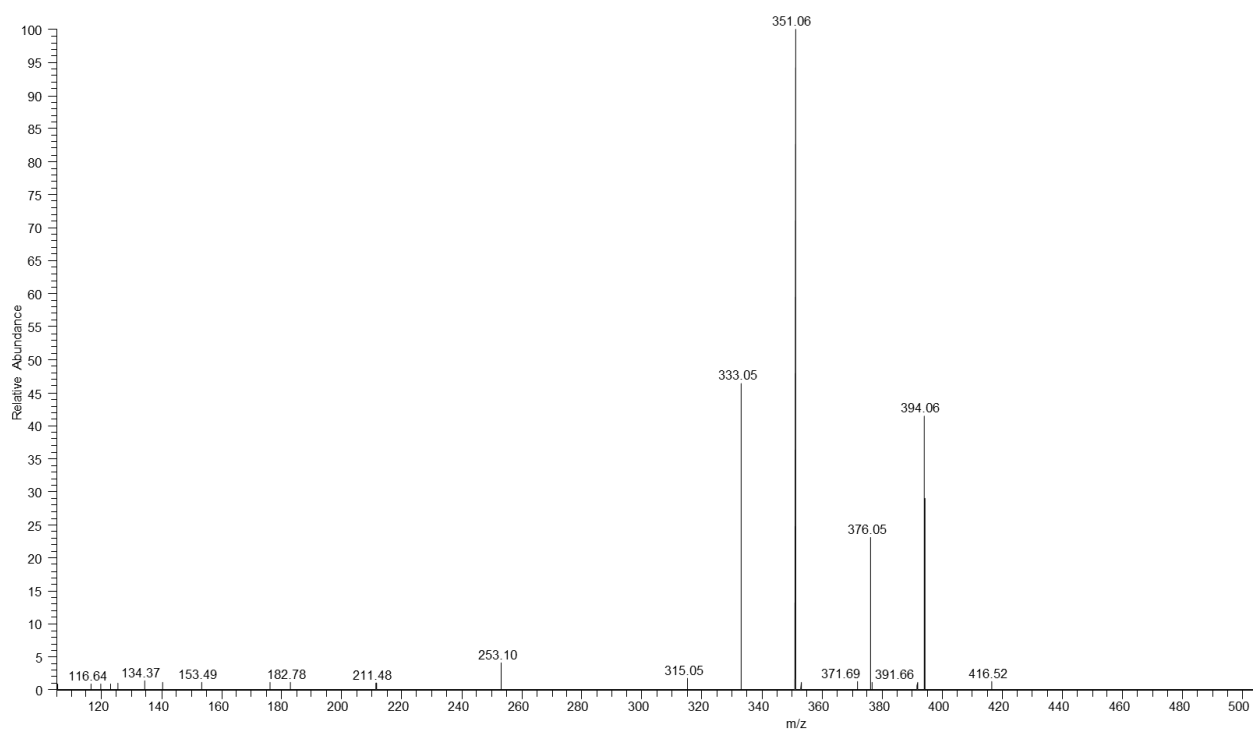

**Figure S18.** HCD MS<sup>2</sup> spectrum of  $m/z$  394 (GTX6) in *M. galloprovincialis* at ESI<sup>-</sup>. Energy: 55 arbitrary units.

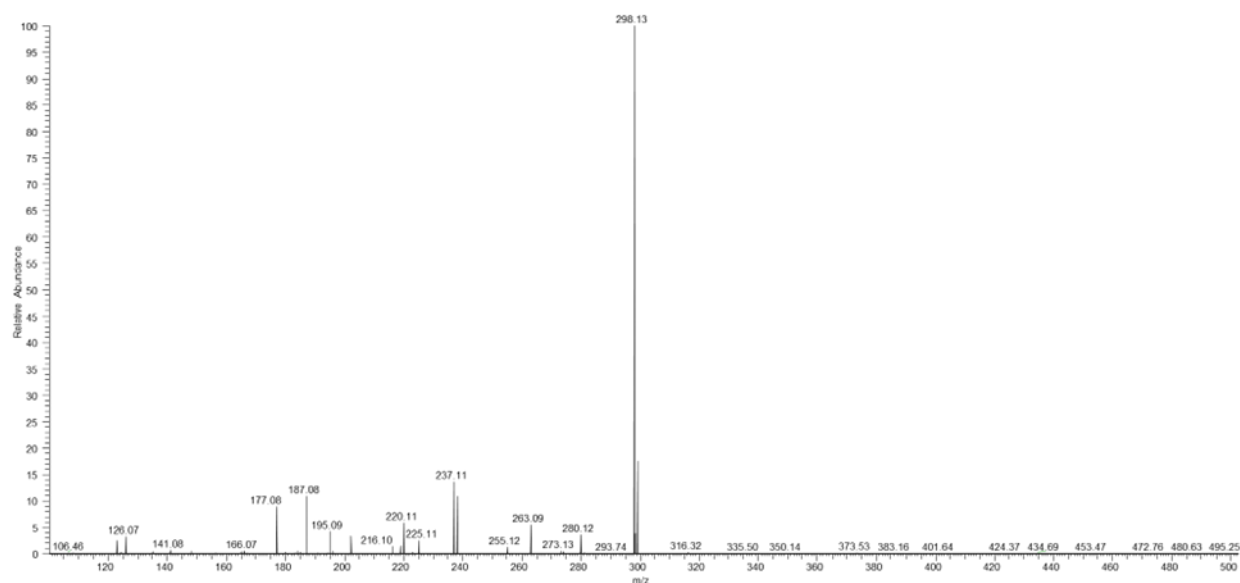

**Figure S19.** CID MS<sup>2</sup> spectrum of  $m/z$  316 (GTX6 [M + H - SO<sub>3</sub>]<sup>+</sup> *in-source* fragmentation) in *M. galloprovincialis* at ESI<sup>+</sup>. Energy: 35 arbitrary units.

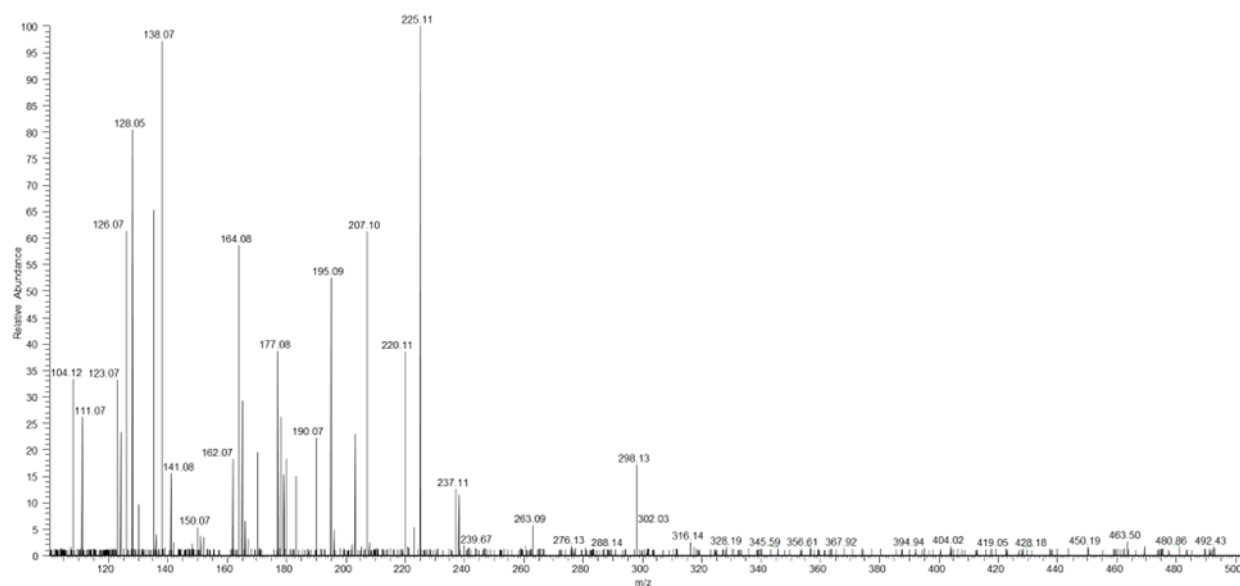

**Figure S20.** HCD MS<sup>2</sup> spectrum of  $m/z$  316 (GTX6 [M + H - SO<sub>3</sub>]<sup>+</sup> *in-source* fragmentation) in *M. galloprovincialis* at ESI<sup>+</sup>. Energy: 60 arbitrary units.

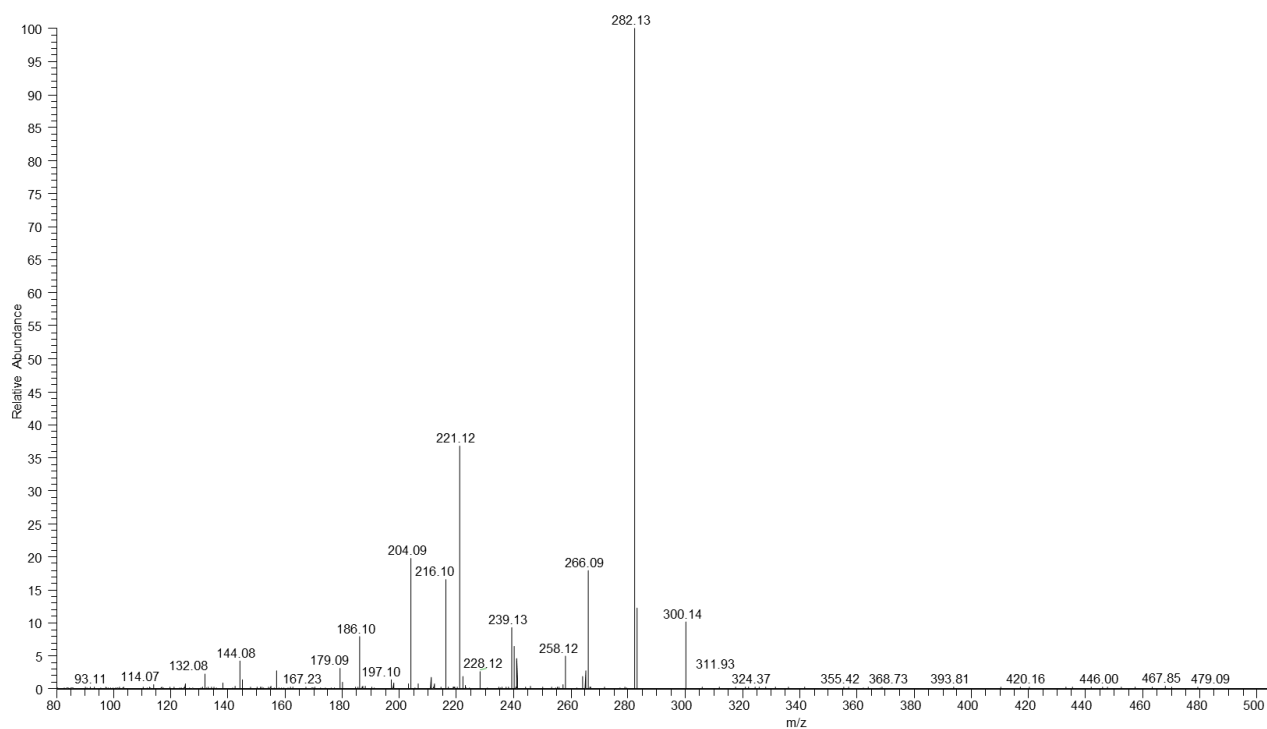

**Figure S21.** CID MS<sup>2</sup> spectrum of  $m/z$  300 (STX) in *M. galloprovincialis* at ESI<sup>+</sup>. Energy: 20 arbitrary units.

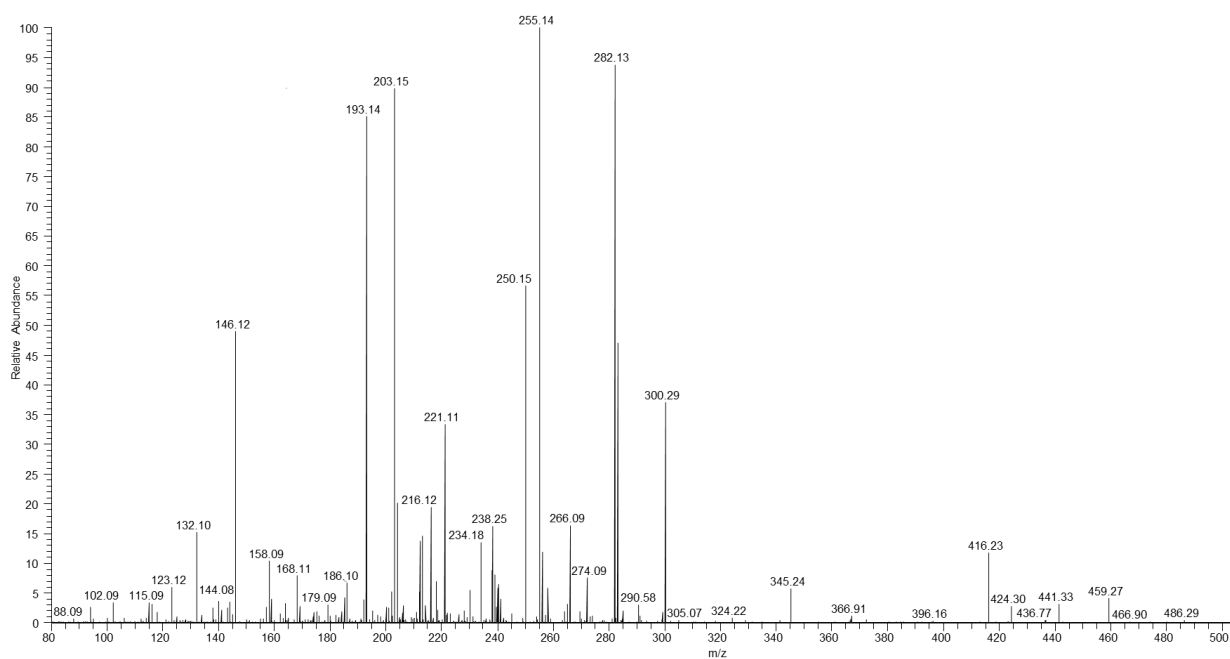

**Figure S22.** HCD MS<sup>2</sup> spectrum of  $m/z$  300 (STX) in *M. galloprovincialis* at ESI<sup>+</sup>. Energy: 55 arbitrary units.

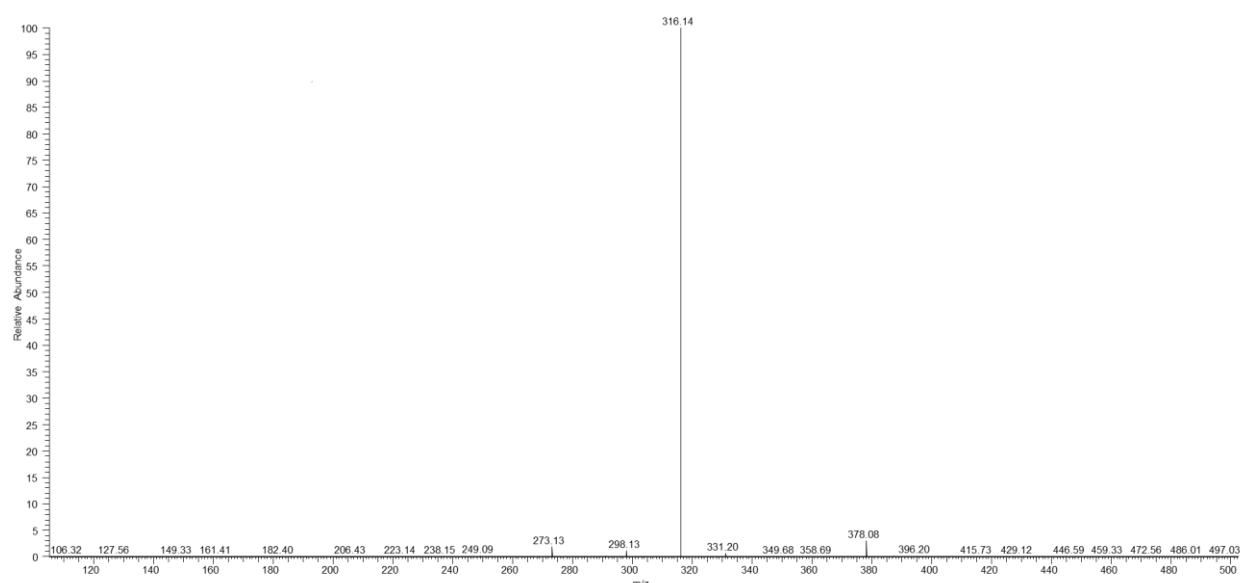

**Figure S23.** CID MS<sup>2</sup> spectrum of  $m/z$  396 (M1) in *M. galloprovincialis* at ESI<sup>+</sup>. Energy: 16 arbitrary units. Quantified in ESI<sup>-</sup>  $m/z$  394.07810.

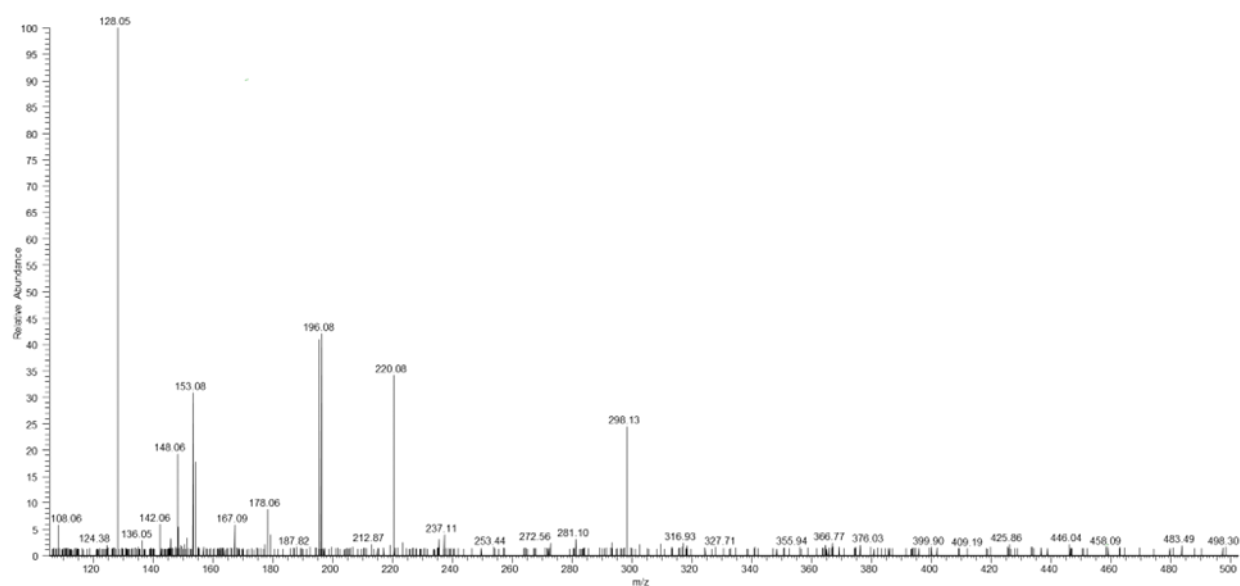

**Figure S24.** HCD MS<sup>2</sup> spectrum of  $m/z$  396 (M1) in *M. galloprovincialis* at ESI<sup>+</sup>. Energy: 70 arbitrary units. Quantified in ESI<sup>-</sup>  $m/z$  394.07810.

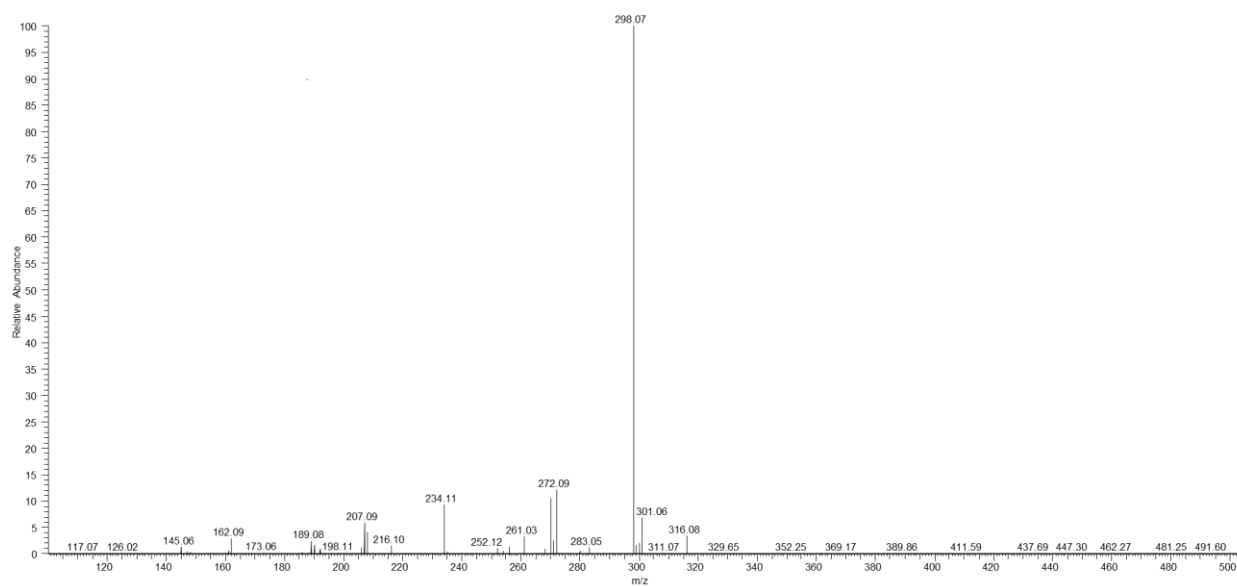

**Figure S25.** CID MS<sup>2</sup> spectrum of  $m/z$  316 (M1  $[M + H - SO_3]^+$  in-source fragmentation) in *M. galloprovincialis* at ESI<sup>+</sup>. Energy: 35 arbitrary units. Quantified in ESI<sup>-</sup>  $m/z$  394.07810.

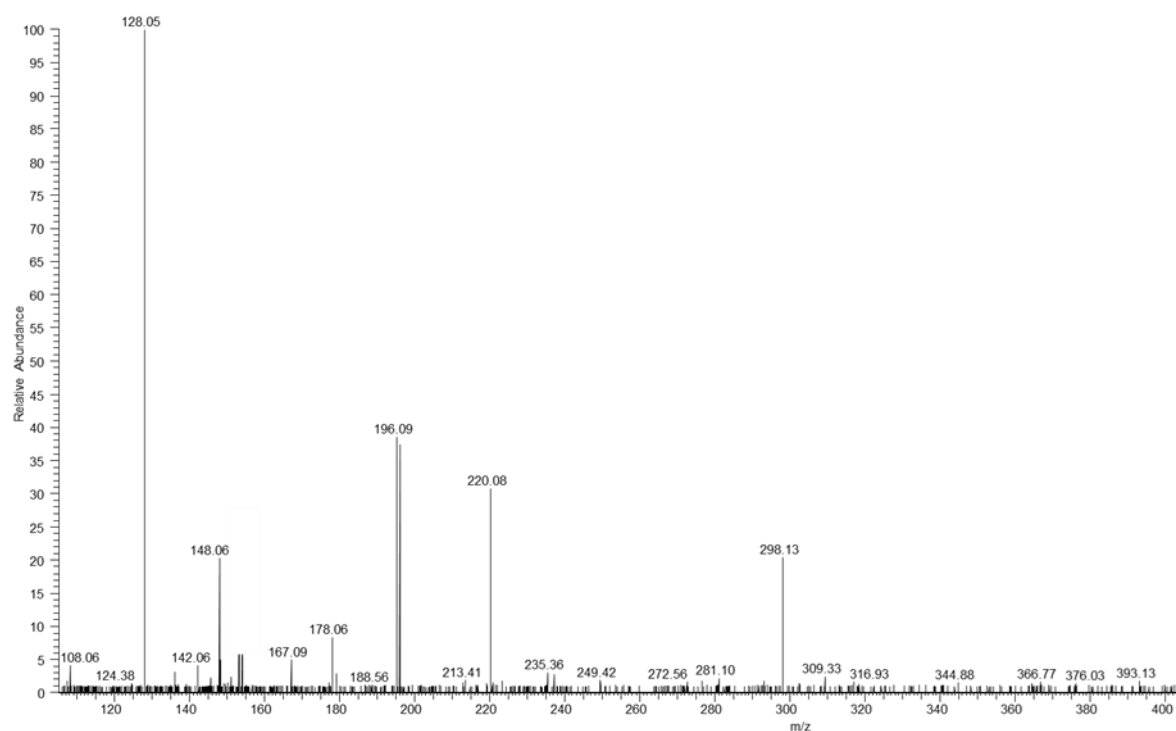

**Figure S26.** HCD MS<sup>2</sup> spectrum of  $m/z$  316 (M1  $[M + H - SO_3]^+$  in-source fragmentation) in *M. galloprovincialis* at ESI<sup>+</sup>. Energy: 70 arbitrary units. Quantified in ESI<sup>-</sup>  $m/z$  394.07810.

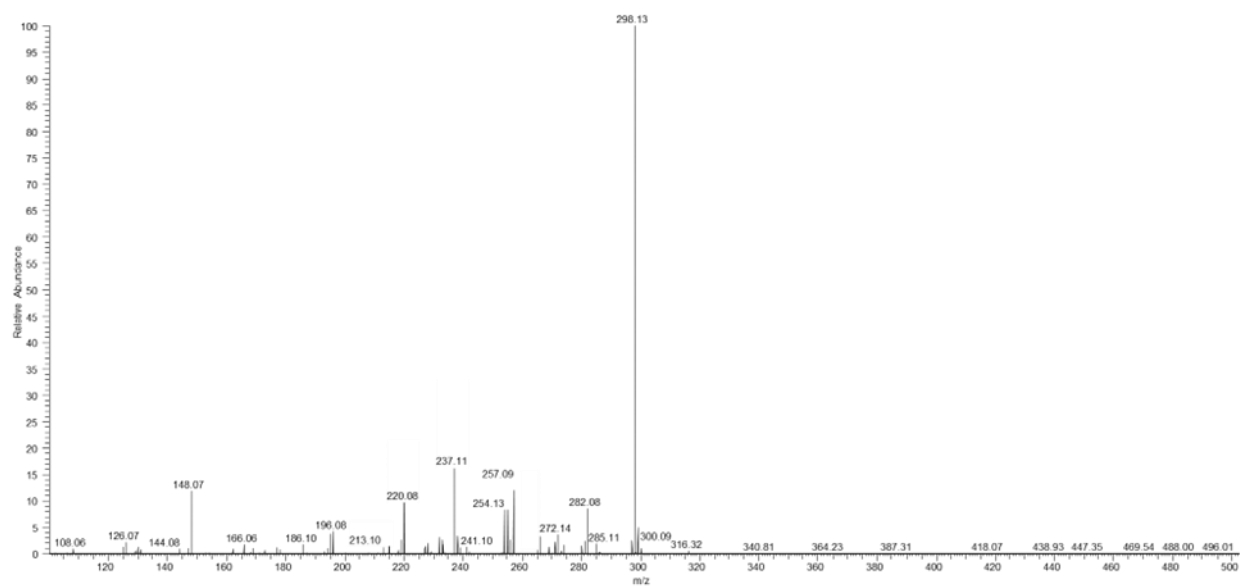

**Figure S27.** CID MS<sup>2</sup> spectrum of  $m/z$  316 (M2) in *M. galloprovincialis* at ESI<sup>+</sup>. Energy: 35 arbitrary units.

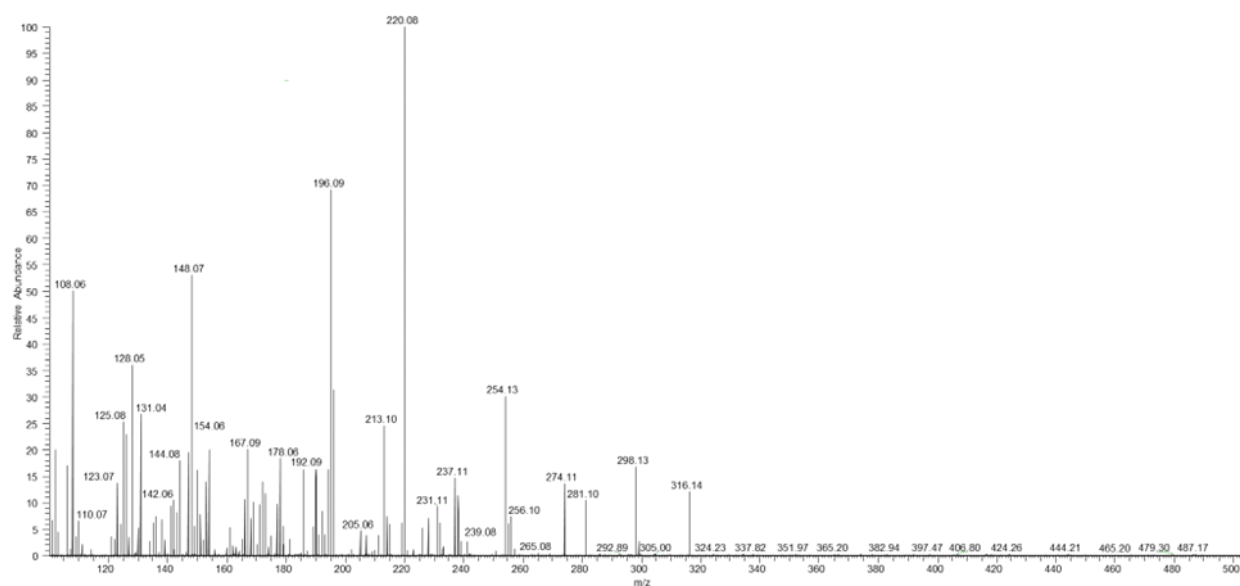

**Figure S28.** HCD MS<sup>2</sup> spectrum of  $m/z$  316 (M2) in *M. galloprovincialis* at ESI<sup>+</sup>. Energy: 60 arbitrary units.

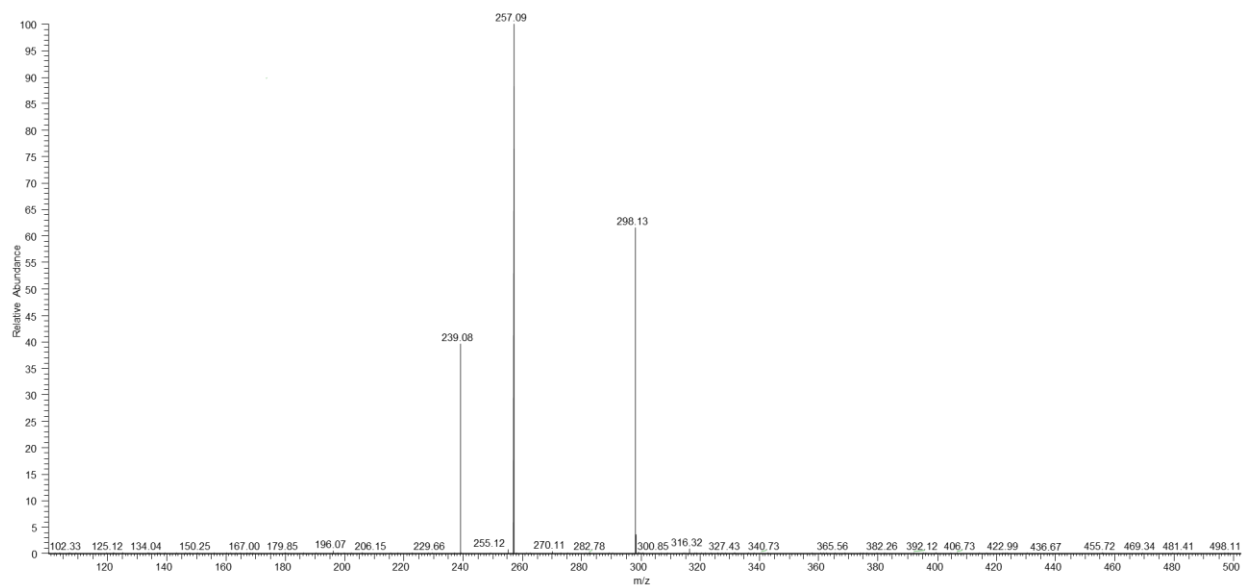

**Figure S29.** CID MS<sup>2</sup> spectrum of  $m/z$  316 (M6) in *M. galloprovincialis* at ESI<sup>+</sup>. Energy: 35 arbitrary units.

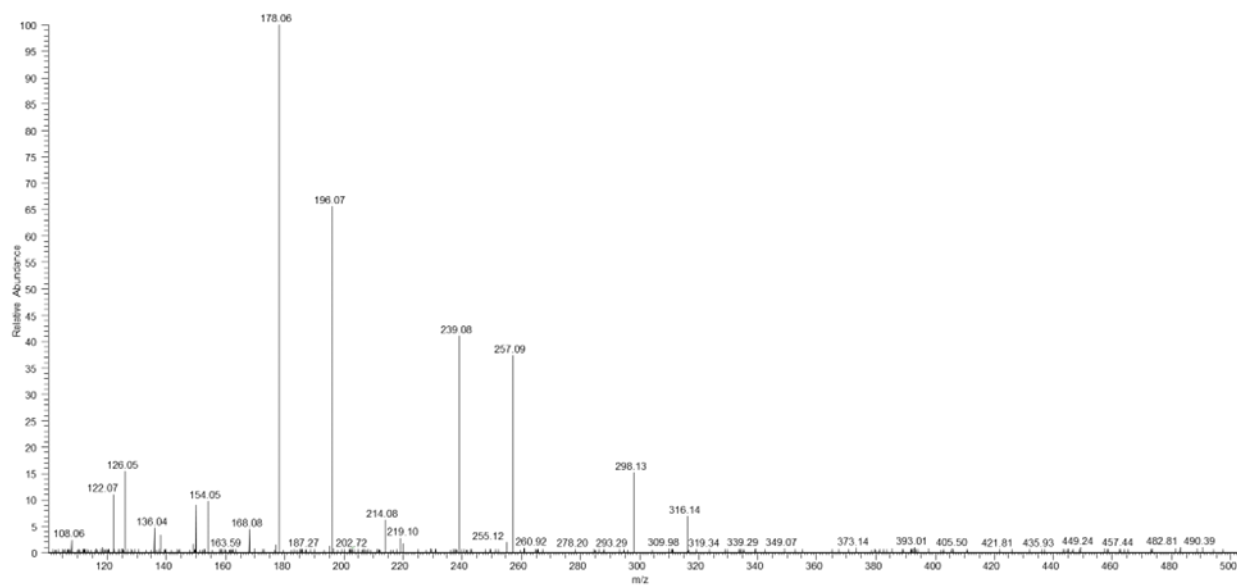

**Figure S30.** HCD MS<sup>2</sup> spectrum of  $m/z$  316 (M6) in *M. galloprovincialis* at ESI<sup>+</sup>. Energy: 60 arbitrary units.



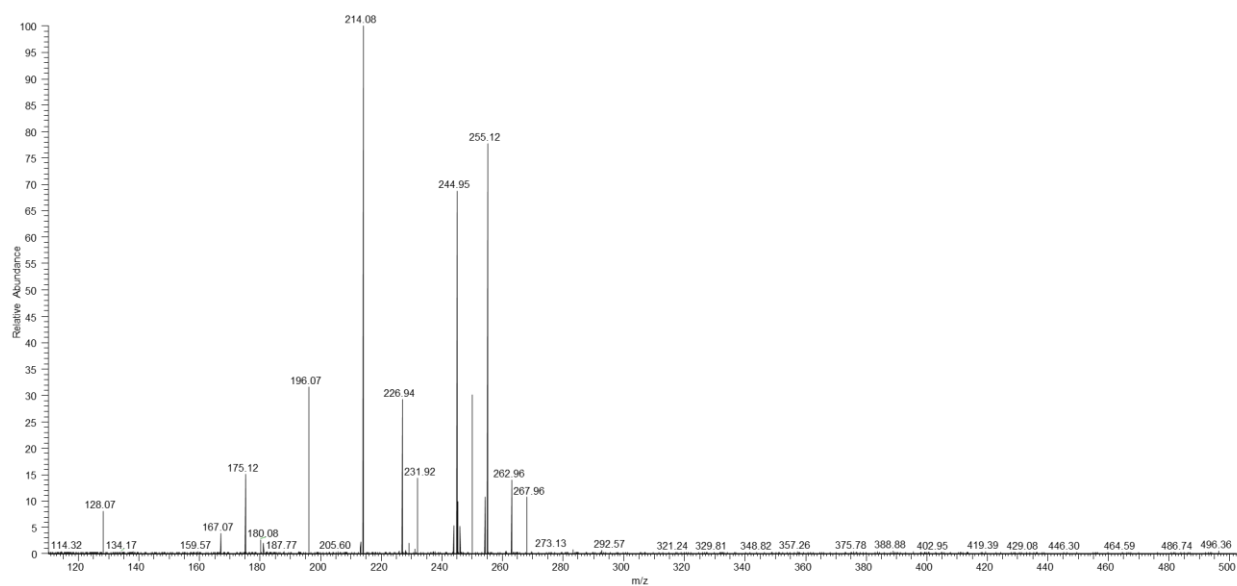

**Figure S31.** CID MS<sup>2</sup> spectrum of  $m/z$  273 (dcM6) in *M. galloprovincialis* at ESI<sup>+</sup>. Energy: 35 arbitrary units.

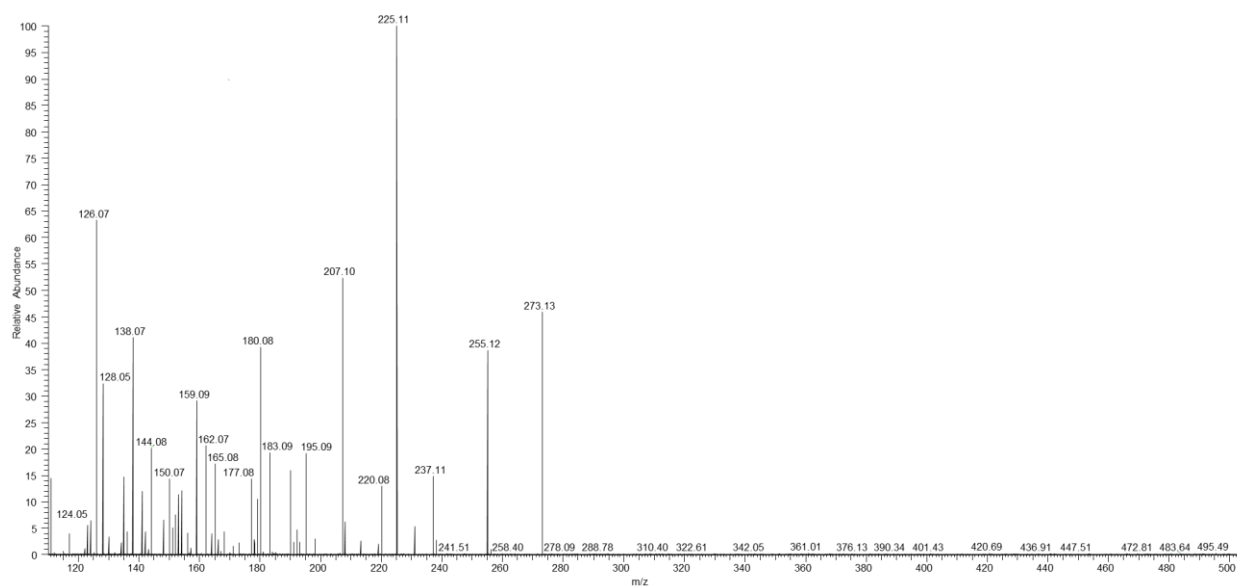

**Figure S32.** HCD MS<sup>2</sup> spectrum of  $m/z$  273 (dcM6) in *M. galloprovincialis* at ESI<sup>+</sup>. Energy: 60 arbitrary units.

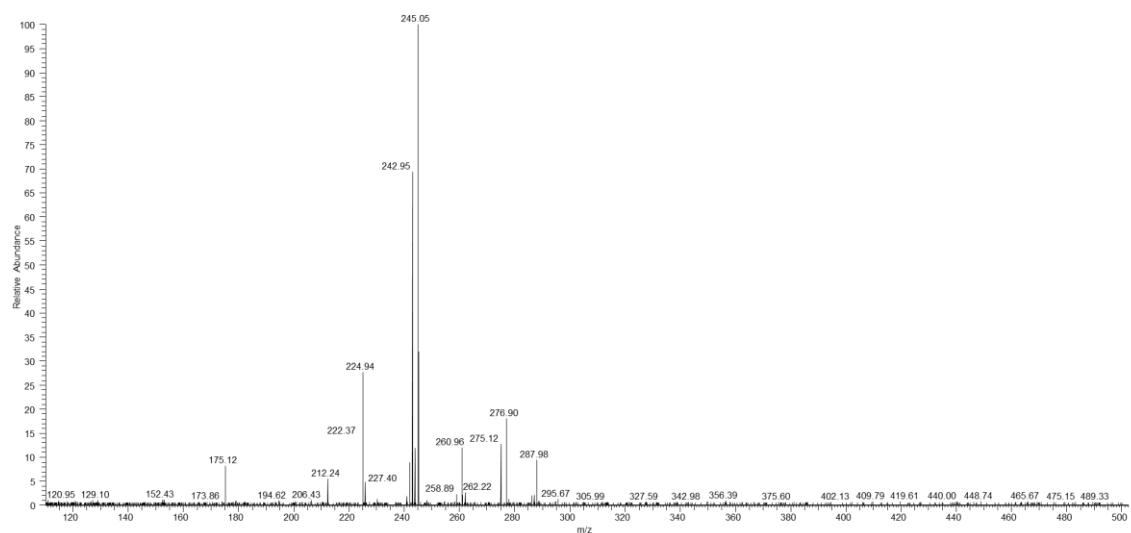

**Figure S33.** CID MS<sup>2</sup> spectrum of  $m/z$  305 (dcM10) in *M. galloprovincialis* at ESI<sup>+</sup>. Energy: 35 arbitrary units.

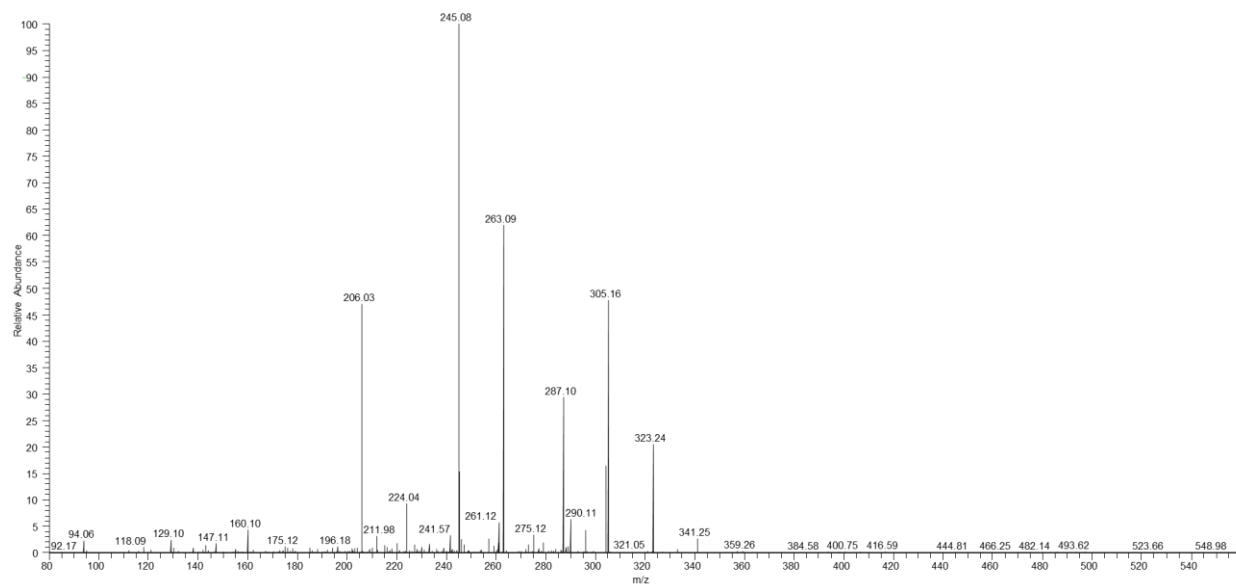

**Figure S34.** HCD MS<sup>2</sup> spectrum of  $m/z$  305 (dcM10) in *M. galloprovincialis* at ESI<sup>+</sup>. Energy: 55 arbitrary units.
